# Supplementary material for: Light trapping by porous TiO2hollow hemispheres for high efficiency photoelectrochemical water splitting
Source: Royal Society of Chemistry journal article supplement (doi:10.1039/d2cp04246k), 2023-01-01
Supplement: d2cp04246k1.pdf [file d2cp04246k1.pdf]

## Supporting information

### **Light Trapping by Porous TiO<sub>2</sub> Hollow Hemispheres for High Efficient Photoelectrochemical Water Splitting**

*Yuanxing Fang<sup>1,2</sup>, Ronan Hodgson<sup>1</sup>, Wei Cheat Lee<sup>1</sup>, Huyen Le<sup>1</sup>, Hon Wing Boaz Chan<sup>1</sup>,  
Hassan M. Hassan<sup>3</sup>, Ibrahim H. Alsohaimi<sup>3</sup>, Giacomo E. Canciani<sup>1,4</sup>, Rong Qian<sup>5</sup>, and Qiao  
Chen<sup>1\*</sup>*

<sup>1</sup> Department of Chemistry, School of Life Sciences, University of Sussex, Brighton, BN1 9QJ, UK.

<sup>2</sup> State Key Laboratory of Photocatalysis on Energy and Environment, College of Chemistry, Fuzhou University, Fuzhou 350116, P. R. China

<sup>3</sup> Chemistry Department, College of Science, Jouf University, Sakka, P.O. Box 2014, Saudi Arabia

<sup>4</sup> Imec, Kapeldreef 75, 3001 Leuven, Belgium

<sup>5</sup> National Centre for Inorganic Mass Spectrometry in Shanghai, Shanghai Institute of Ceramics, Chinese Academy of Science, Shanghai 200050, P. R. China

\*Corresponding author. Email address: qiao.chen@sussex.ac.uk

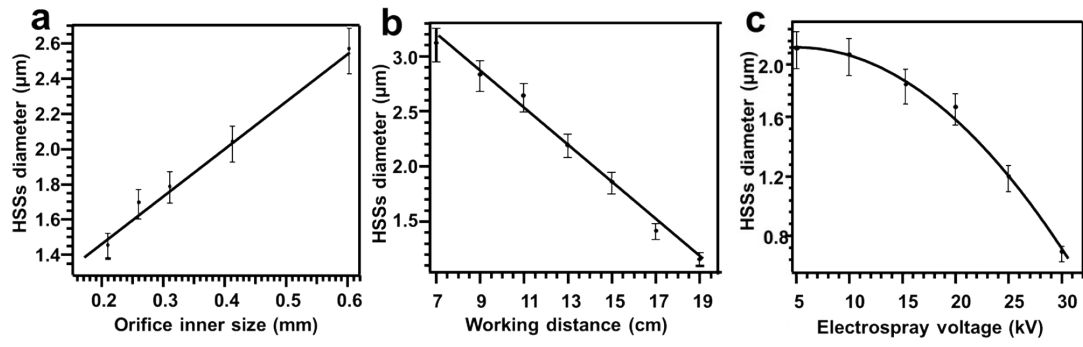

**Figure S1.** The average outer diameter of the HSSs as a function of (a) the orifice inner size, (b) the distance between the end of the orifice and the collector, and (c) the applied voltage.

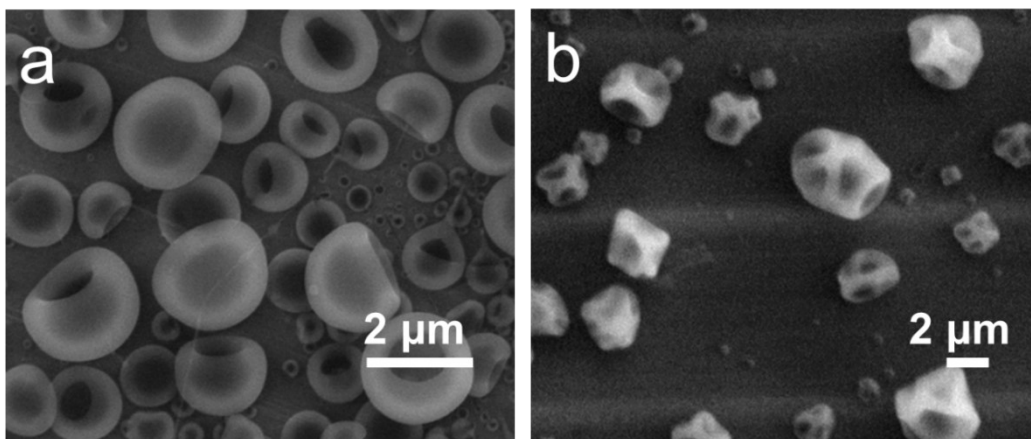

**Figure S2.** The morphology of as-prepared TTIP/HHSs prepared by various TTIP concentrations of (a) 4 wt% and (b) 6 wt%.

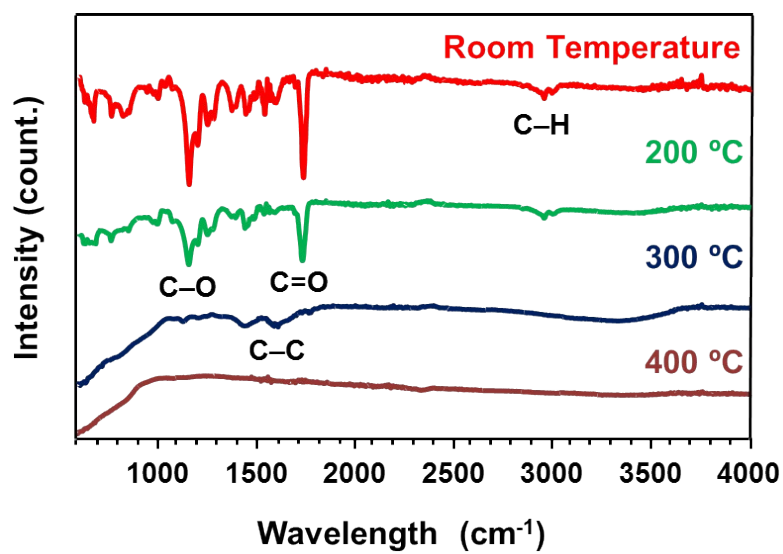

**Figure S3.** Thermal degradation of the PMMA/TTIP HHSs film using FTIR-ATR at room temperature, 200 °C, 300 °C, and 400 °C.



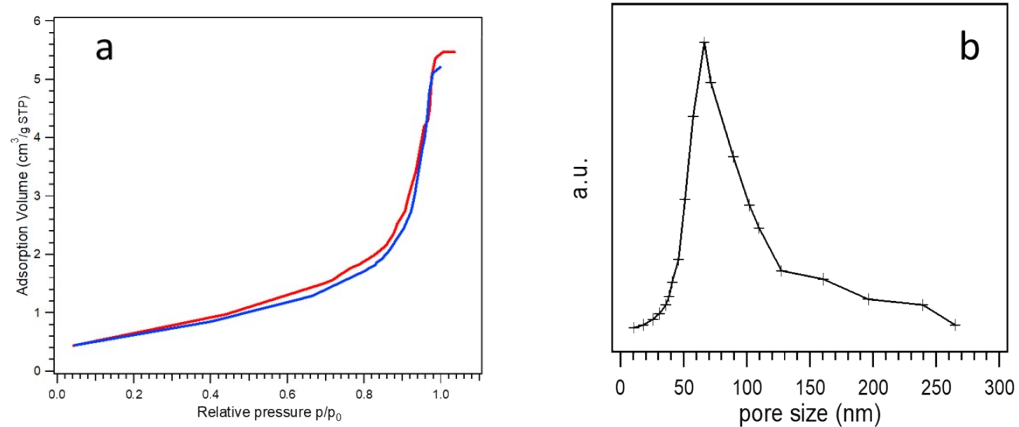

**Figure S4.** (a)  $N_2$  adsorption–desorption isotherms and (b) their BJH pore size distribution plots of  $TiO_2$  HHS.

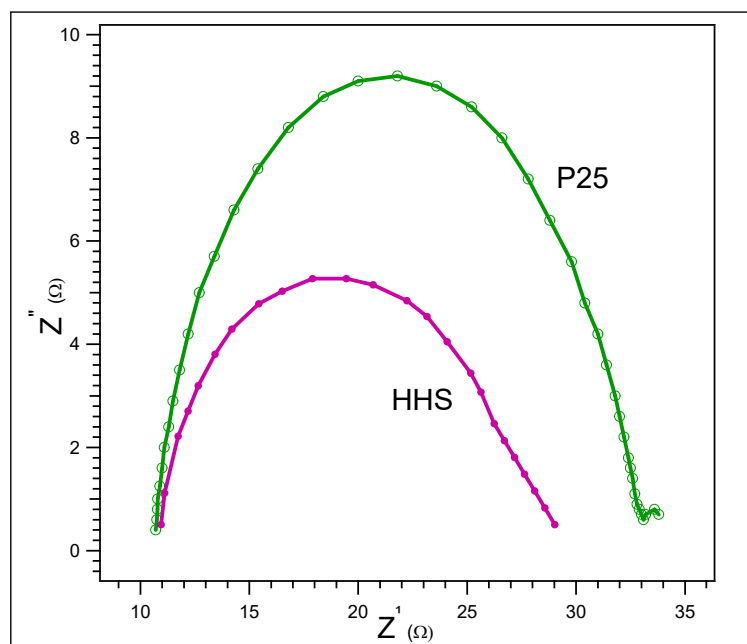

**Figure S5.** Nyquist plot of  $\text{TiO}_2$  HHS and P25.

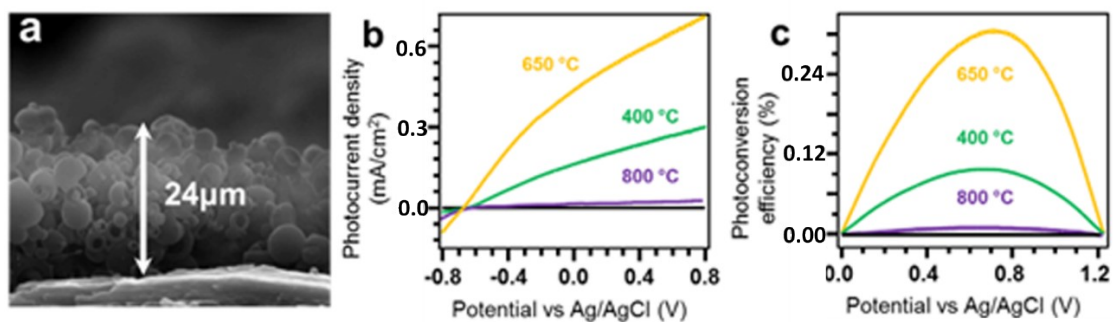

**Figure S6.** (a) The cross-sectional view of the TiO<sub>2</sub> HHSs film for the photoreaction studies. (b) The photocurrent density of the TiO<sub>2</sub> HHSs film after calcination at 400 °C, 650 °C, and 800 °C and (c) the corresponding photoconversion efficiency.
